# Discovery of the prickles patterning on the stem of rose and the mathematical model of the pattern

Kazuaki Amikura<sup>1,2\*</sup> and Hiroshi Ito<sup>3</sup>

<sup>1</sup>Department of Molecular Biophysics and Biochemistry, Yale University, New Haven, Connecticut, USA

<sup>2</sup>Department of Computational Biology and Medical Sciences, Graduate School of Frontier Sciences, The University of Tokyo, Japan

<sup>3</sup>Department of Art and Information Design, Faculty of Design, Kyushu University

\*Corresponding Author: kazuaki.amikura@yale.edu

Many developmental patterns of organisms are known that it is orchestrated by diffusion of the factors. Herein we reported the novel patterning that seems to be controlled by the diffusion. Although it looks like the prickles randomly emerge on the stem of rose, we deciphered patterns for the position of prickles on stems of *Rosa hybrida* cv. 'Red Queen'. Prickles occurred frequently at specific angular positions relative to the spiral curves connecting leaf positions on the surfaces of the stems. We proposed a mathematical model based on diffusion to explain the process via which the patterns emerged. The model assumed the presence of diffusion factors from primordia that suppress the development of prickles. As a result, this model shows the prickles patterning similar to those observed on live specimens. Moreover, by changing the model parameters of the assumed factors, we reproduce the pattern that is on other plant species. The finding indicates that the patterns of prickles in the kingdom Plantae are organized by similar diffuse systems. Further investigation will provide various insights into the molecular mechanism of prickles development and the role of the prickles patterning.

Plant development | Rose | Prickle | Mathematical model | Diffusion

Correspondence: kazuaki.amikura@yale.edu

Roses have prickles that appear seems to be randomly placed on the surface of the stem (Fig. 1a). It is considered that the glandular trichome developed from an epidermal tissue seem to be grown into prickle in rose from observation with an electron microscope (1). The development of the prickle is not understood at a molecular level. No causative gene of prickle has been identified. The patterning of the position on the stem is also not identified.

Recent studies revealed many kinds of the pattern of plant is orchestrated by the diffusion. Diffusion of the factors, such as hormone, peptide and, protein, invoke many reaction networks between the cells, genes or chemicals concerning the development that form the pattern of life. General idea including the form of life was suggested by Alan M. Turing (2). He suggested the diffusion of the factors invoke the development of the pattern. For half a century from then, it has been shown that his model applies to many phenomena of the development of life (3, 4). Auxin that is a plant hormone plays a central role in the development (5). Especially, the development mechanism of the phyllotaxis pattern that is the positioning of leaves on the stem has well understood based on the diffuse of auxin. It is proposed that the phyllotaxis of *Arabidopsis* is dependent on polar auxin transport (6, 7). The pattern of leaf venation is also explained by polar auxin transport in leaves (8). Otherwise, the position of stomatal and trichome are considered to be organized by diffusing fac-

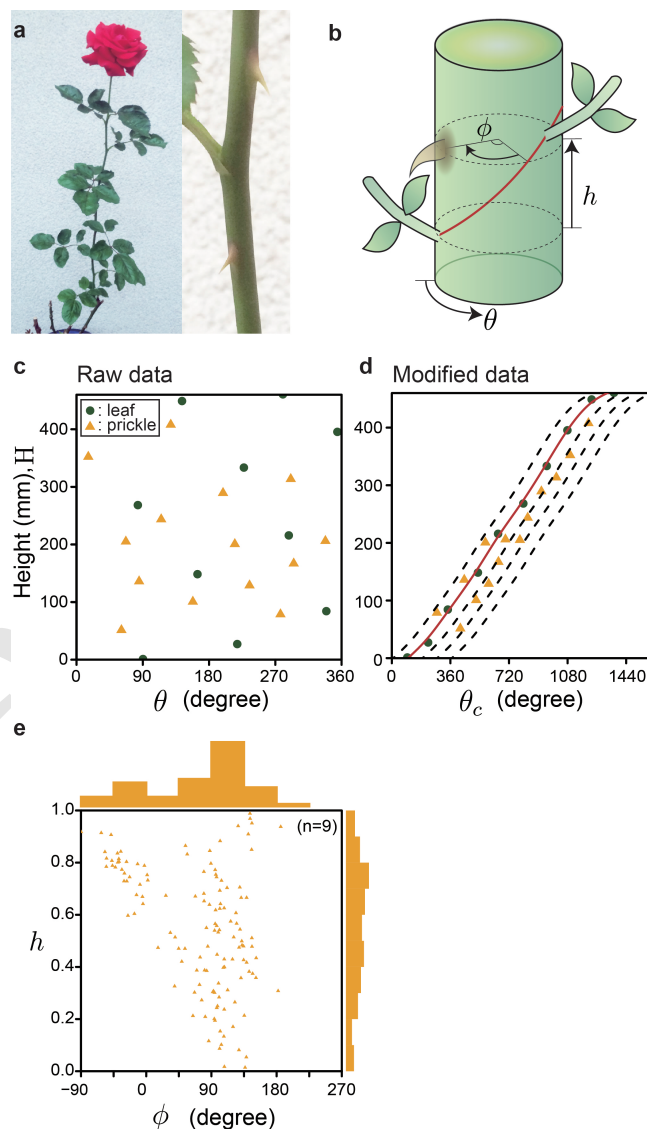

**Fig. 1.** Pattern of prickle. a, Complete view and prickle of *Rosa hybrida* cv. 'Red Queen'. b,  $\theta$  is the measured angle of leaf or prickle.  $\phi$  is the degree between prickle and the spline curve at same height on the stem. Let  $h$  define as the height of prickle between adjacent leaves, where the length between two leaves is 1. c, The position of leaves and prickles on the stem. Green circle is leaf. Yellow triangle is prickle. d, Deep red line show the spline curve connecting leaves. The dotted line was drawn by adding  $-90^\circ$ ,  $90^\circ$ ,  $180^\circ$ , or  $270^\circ$  to the spline curve. e, Scatter plot of  $\phi$  and  $h$  profile from measured samples ( $n=9$ ). The histogram represents the distribution of  $\phi$  or  $h$  from measured samples.

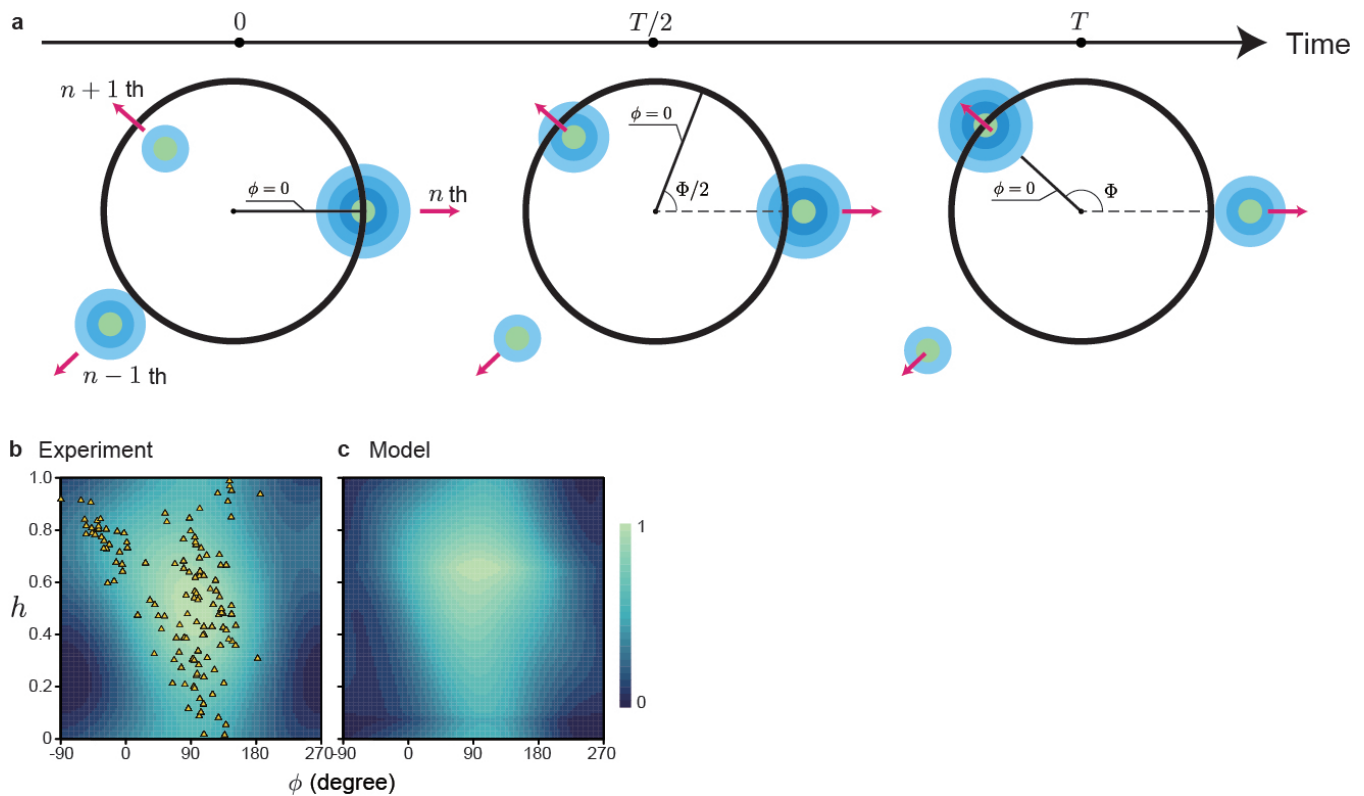

**Fig. 2.** A model for development of prickles. **a**, Schematic diagram for distribution of inhibitor for development of prickles produced by primordia. Primordia are periodically created with an angle of  $\Phi$  on a meristem. We assumed each primordia produces an inhibitor for creation of prickles and moves to outside at a constant velocity as growing. The prickles can be produced at a distance from the top of meristem (black circle) and the probability of synthesis of prickles on the circle is proportional to reciprocal of concentration of the inhibitor. The position on the circle can be specified by  $\phi$ , the angle from the spline curve. Black line from the center to the edge shows the point of  $\phi = 0$  at each time. The amount of secretion of the inhibitor follows  $k(T)$ . **b**, Estimated density of prickles on the  $\phi$ - $h$  plane through kernel density estimation for real data (Fig. 1e). **c**, Computer simulated density of prickles with a set of optimized parameters at  $\alpha = 0.267$ ,  $\beta = 0.139$ ,  $T_a = -0.909$ ,  $T_b = 0.980$  and  $T_c = 1.590$ .

tors such as protein and peptide(9). As these results show, the diffusion of the factors is fundamental phenomena for the development of plant.

In this paper, we report the position of prickle on stem at rose has the pattern and suggests the mathematical model based on the diffusion. We think this is the first report about the position of prickle with statistical data and mathematical model in the history of the rose. Those data will help to understand the molecular mechanism of the development of prickle and to identify the causative gene.

*Rosa hybrida* cv. 'Red Queen' that has many prickles on the stem is used for the experiments (Fig. 1a). We measured the height and the angle of prickles during blooming the rose. We defined the measured height from the root of the shoot to leaf or prickle,  $H$ , and the measured angle of leaf or prickle with a stem as the axis,  $\theta$  (Fig. 1b). The angle of leaves of *Rosa hybrida* cv. 'Red Queen' showed spiral pattern based on the golden angle  $\Phi$  (Supplementary Fig. 1).  $\theta$  was modified to  $\theta_c$  that is cumulative value of  $\theta$ , where  $\theta_c = \theta + 360N$  and  $N$  is non-negative integers, in order to express the relation of degree and height as a function (deep red line in Fig. 1c and Supplementary Fig. 2). From the low position leaf to the high position leaf,  $N$  of each leaf was selected so that  $\theta_c$  of leaf increase monotonically. The spline curve connecting the leaf position  $\theta_c$  is drawn on the  $\theta_c - H$  plane (Fig. 1D (deep red line)). The spline curve is expressed as a function of height,

$h, \hat{\theta}_{sp}(h)$ . We defined the angle from the spline curve as  $\phi$  (Fig. 1d).

$$\phi_i = \theta_{ci} - \hat{\theta}_{sp}(h_i^p),$$

where  $i$  is the index of prickle, is assigned in order from bottom to top.  $N$  of prickle was selected so that  $\phi$  of prickle ranged from  $-90^\circ$  to  $270^\circ$ .

We discovered that the prickle occurs frequently in the range of  $\phi$  between  $90^\circ$  and  $135^\circ$  at any  $h$  (Fig. 1E). If  $\phi$  is between  $-90^\circ$  and  $0^\circ$ , prickles were emerged at over  $h > 0.6$ . On the other hand, there are almost no prickles in other areas. Those results strongly demonstrate the position of prickle has a pattern.

The fact that prickles emerge with a specific angle to leaves implies there are some regulations by primordia in the development of prickles. We constructed a simple model that reproduces the pattern of prickles on plane surface centered on apical meristem. The model assumed that periodically-generated primordia regulate the development of prickles through producing the inhibitor. Primordia moves straight away from the top of meristem. The direction of migration of primordia is shifted by  $\Phi$  from the direction of the last produced primordia. The priming circle where the location of prickles is determined locates at a distance from the top of apical meristem. We also assumed the diffusion rate enough rapid that the inhibitor rapidly get equilibrium. Thus, distribution of inhibitor on the meristem is two-dimensional Gaus-

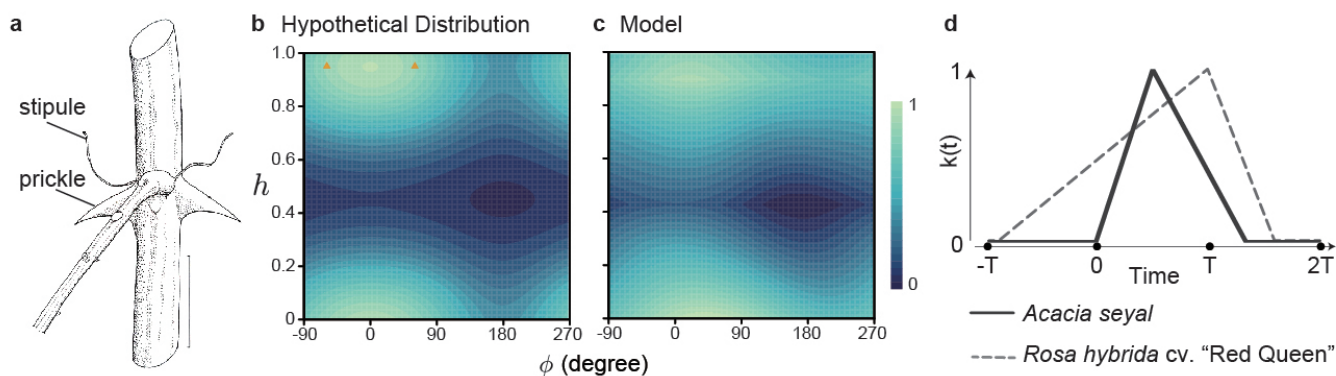

**Fig. 3.** Estimation of the other pattern. a, Drawing of *Acacia seyal* which is modified from the Adrian's book at page 146 and 147(10). b, The  $h$ - $\phi$  plane drawn by estimated prickles pattern of *Acacia seyal*. The  $h$  is 0.95. The  $\phi$  of the two prickles is 60 and -60. c, Computer simulated density of prickles with a set of optimized parameters at  $\alpha = 0.227$ ,  $\beta = -0.144$ ,  $T_a = -0.023$ ,  $T_b = 0.489$  and  $T_c = 1.330$ . d, Plot of the time dependent production rate  $k(t)$ .

sian distribution, implying that the concentration of inhibitor on the priming circle can be described as von Mises distribution,  $k \exp(m \cos \phi)$ , where  $m$  is a concentration parameter and  $k$  is a arbitrary constant. These parameters,  $m$  and  $k$ , depend on time in our model.  $m$  should be proportional of the distance between the source of inhibitor and the center of the priming circle. Thus, we described the time dependence of  $m$  as  $m(t) = \max[\alpha t + \beta, 0]$ , where  $\alpha > 0$ , suggesting that primordia moves at a constant velocity. In addition, we hypothesized the production rate of inhibitor as a function of time,  $k(t)$  that maximize after when the primordia had passed through the priming circle. We assumed  $k(t)$  is a piecewise linear function that has three parameters  $T_a$ ,  $T_b$ , and  $T_c$  (see Model in Methods). It imply that the position of prickles locating between  $n$ -th and  $n + 1$ -th primordia can be determined by the distribution of inhibitor produced by  $n + 1$ th,  $n$ th and  $n - 1$ th primordia (Fig. 2a).

The parameter in the model,  $\alpha$ ,  $\beta$ ,  $T_a$ ,  $T_b$ , and  $T_c$  were optimized to maximize the correlation between the actual pattern of prickles,  $p(h, \phi)$  and reciprocal of the amount of inhibitor,  $f(h, \phi)^{-1}$ .  $p(h, \phi)$  was estimated from the real data (Fig. 2b and Methods). The optimized model qualitatively reproduced the actual distribution of prickles that peaks around  $90^\circ$ . Note that we repeated the optimization procedure with  $10^4$  initial parameter sets. The parameters converged to either of two distinct parameter sets through the optimization. Fig. 2c was drawn based on the set of parameters that produces the distribution of  $f$  with the highest correlation to real data. The other set of parameters also produces the similar distribution of  $f$  although  $k(t)$  obtained from the parameters is shifted by approximately  $0.2T$  (Supplementary Fig. 3). Additionally, We evaluate the dependency of the parameters relating to the diffusion of the inhibitor on maintaining the prickles patterning (Supplementary Fig. 4a). As a result, it was found that the distribution of the inhibitor being concave downward is crucial for reproducing the pattern of 'Red Queen' (Supplementary Fig. 4b, lower graphs). On the other hand, the pattern is relatively robust for quantitatively altering the distribution of the inhibitor itself (Supplementary Fig. 4b, upper graphs).

We tested that our model is able to show the pattern of

prickles in other plant species. Many plants show a pair of prickles under the root of leaf, not stipule (Fig. 3a). For example, *Rosa hirtula* (Regel) Nakai and *Acacia seyal* has a pair of the prickles at the same height (10) (Fig. 3a). We found the parameter set showing pair pattern on  $\phi$ - $h$  plane through the optimization algorithm (Fig. 3b, 3c). The releasing time of the inhibitor in *Acacia seyal* is different from 'Red Queen' (Fig. 3d). This result indicates differences in the parameter sets of the diffusion can cause the diversity of the prickles patterning in the kingdom Plantae (Supplementary Fig. 5).

Here, We have focused on the interactions between primordia and prickles so far, but interaction between prickles was indicated by the length  $d_{pp}$  between a prickles and the nearest one. The  $d_{pp}$  of the 'Red Queen' showed the growing prickles strongly inhibit the development of other prickles within about 5 mm radius (Supplementary Fig. 6a). It indicates growing prickles prevent the growth of other prickles surrounds growing one, like excluded volume effects. If there is no excluded volume effects and the position is determined randomly, fused prickles must be more appeared on the stem (Supplementary Fig. 6b).

In future studies, the prickles position on the other species of roses should be measured, in order to confirm that the patterning based on our model is conserved between the species. The number of prickles on the stem has a large variation between species of roses. Those differences of prickles patterning could be reproduced by the changing parameters. In addition, time-dependent development of prickles should be observed in future studies. Small prickles whose height is lower than 1 cm were observed (Supplementary Fig. 7). Especially, they appeared frequently at the bottom side of the stem. Small prickles has been reported on the stem of *Rosa hybrida* cv. 'Laura'(11). However, the patterning of the small prickles is not understood. It is also not known if the small prickles grows in mature prickles or not. The observation may also reveal the  $\phi$  distribution of the prickles is slightly changed depends on the height. We found, when dividing the height from the root to the top leaf into the three layers (Supplementary Fig. 8a), the unimodal distribution is shown at the top layer, but bimodal distribution is shown at the other layers (Supplementary Fig. 8b). Those facts may indicate the



parameters of the prickles slightly changes as the rose grows.

Although humans have characterized roses in numerous reports since the start of cultivation several thousand years ago, this is the first report to show the prickles pattern with the statistical data and mathematical modeling of prickles pattern on the stem. Further investigation to reveal the entity of the diffusing factors will help not only to understand the development of the prickles but also to develop our mathematical model. The developing of the mathematical model will give us many insights to build a novel theory of plant development.

## Methods

**Plant materials and measurement.** *Rosa hybrida* cv. 'Red Queen' was purchased from Keisei Rose Nurseries (Chiba, Japan). The plants were cultivated in pots placed at the open field under natural daylight. The angle and position of prickles and leaves on the lateral axis were measured by protractor and calipers. The direction from the lateral axis to the main axis was set to  $0^\circ$ . Small prickles with a height of 1 cm or less were not measured. Clockwise and counter clockwise spiral pattern of leaf were not distinguished in this study. All data was analyzed by R program ver. 3.5.2.

**Model.** We assumed that the emergence of prickles can be inhibited by the diffusive molecules secreted from the primordia that radially move down from meristem. The primordia can be produced with a constant divergence angle  $\Phi$  at every time interval  $T$ . The priming zone where the prickles are emerged locates on the meristem. If the priming zone is not large, the zone can be simply represented as a circle. Let  $\phi$  be an angle on the circle of priming zone and set  $\phi = 0$  for the direction of  $n$ th primordia, without loss of generality. Suppose that the initiator can diffuse on only the surface on the meristem. Concentration of diffusive particles produced in a single point and randomly diffuse on a 2D plane obey the normal distribution at equilibrium state. Then, the particles on a circle with a distance  $m$  from the source are distributed as a von Mises distribution (12). Thus, the intensity of inhibitor at a angle of  $\phi$  on priming circle can be approximately proportional to von Mises distribution, i.e.,  $f_i(\phi) = k \exp(m \cos(\phi - \phi_i))$ , where  $\phi_i$  is the direction of  $i$ th primodium and  $k$  is a constant. We here set  $t = 0$  at the time when  $n$ th primordia pass the priming zone and  $m(t) = \max[\alpha t + \beta, 0]$ . In addition, we assumed the secretion of inhibitor arises when the primordia is passing through vicinity of priming zone, thus depends on  $t$ . The magnitude of secretion,  $k(t)$ , was represented as a piecewise linear function:

$$k(t) = \begin{cases} \frac{t-T_a}{T_b-T_a}, & T_a < t < T_b \\ \frac{T_c-t}{T_c-T_b}, & T_b < t < T_c \\ 0, & \text{otherwise} \end{cases}$$

where  $T_a < T_b < T_c$ ,  $-T < T_a$ ,  $0 < T_c < 2T$ , implying only  $n-1$ ,  $n$  and  $n+1$ th primordia contribute to distribute the inhibitor on the priming circle. Taken together, the total inten-

sity of inhibitor produced from every primodium at time  $t$ ,  $f(\phi)$  can be described as,

$$\begin{aligned} f(\phi, t) &= \sum_i f_i(\phi, t) \\ &= k(t-T) \exp\{m(t-T) \cos(\phi - \Phi)\} \\ &\quad + k(t) \exp\{m(t) \cos \phi\} \\ &\quad + k(t+T) \exp\{m(t+T) \cos(\phi + \Phi)\}. \end{aligned}$$

The parameters in this model,  $\alpha$ ,  $\beta$ ,  $T_a$ ,  $T_b$  and  $T_c$  were chosen to reproduce the experimental data through optimization algorithm. The real distribution based on the observation,  $f_r(\phi, t)$  was obtained through kernel density estimation based on the observed arrangement of prickles. We sampled the values of  $f(\phi_i, t_j)$  and  $f_r(\phi_i, t_j)$  where  $\phi_i = 2\pi i/N_d$ ,  $t_j = jT/N_d$  and division number  $N_d$  is 100. The cost function was introduced as the Pearson correlation coefficient for the sampled values of  $f$  and  $f_r$ , multiplied by  $-1$ . Kernel density estimation was performed by the function `kde2d` in the R MASS Package ver 7.3-50. Optimization procedure was performed by the function `optim` with BFGS method in the R stats package ver 3.6.0.

## References

1. Kellogg, A. A., Branaman, T. J., Jones, N. M., Little, C. Z. & Swanson, J.-D. Morphological studies of developing *Rubus* prickles suggest that they are modified glandular trichomes. *Botany* **89**, 217–226, DOI: [10.1139/b11-008](https://doi.org/10.1139/b11-008) (2011).
2. Turing, A. M. The Chemical Basis of Morphogenesis. *Philosophical Transactions of the Royal Society B: Biological Sciences* **237**, 37–72, DOI: [10.1098/rstb.1952.0012](https://doi.org/10.1098/rstb.1952.0012) (1952).
3. Kondo, S. & Miura, T. Reaction-diffusion model as a framework for understanding biological pattern formation. *Science* **329**, 1616–1620, DOI: [10.1126/science.1179047](https://doi.org/10.1126/science.1179047) (2010). NIHMS150003.
4. Green, J. B. A. & Sharpe, J. Positional information and reaction-diffusion: two big ideas in developmental biology combine. *Development* **142**, 1203–1211, DOI: [10.1242/dev.114991](https://doi.org/10.1242/dev.114991) (2015).
5. Vanneste, S. & Friml, J. Auxin: A Trigger for Change in Plant Development. *Cell* **136**, 1005–1016, DOI: [10.1016/j.cell.2009.03.001](https://doi.org/10.1016/j.cell.2009.03.001) (2009). arXiv:1408.1149.
6. Reinhardt, D. et al. Regulation of phyllotaxis by polar auxin transport. *Nature* **426**, 255–260, DOI: [10.1038/nature02081](https://doi.org/10.1038/nature02081) (2003).
7. Smith, R. S. et al. A plausible model of phyllotaxis. *Proceedings of the National Academy of Sciences* **103**, 1301–1306, DOI: [10.1073/pnas.0510457103](https://doi.org/10.1073/pnas.0510457103) (2006).
8. Fujita, H. & Mochizuki, A. The origin of the diversity of leaf venation pattern. *Developmental Dynamics* **235**, 2710–2721, DOI: [10.1002/dvdy.20908](https://doi.org/10.1002/dvdy.20908) (2006).
9. Torii, K. U. Two-dimensional spatial patterning in developmental systems, DOI: [10.1016/j.tcb.2012.06.002](https://doi.org/10.1016/j.tcb.2012.06.002) (2012).
10. Adrian D, B. & Alan, B. *Plant Form: An Illustrated Guide to Flowering Plant Morphology (New Edition)* (Timber Press, Inc/, 2008).
11. Asano, G., Kubo, R. & Tanimoto, S. Growth, Structure and Lignin Localization in Rose Prickle. *Bull. Fac. Agr., Saga Univ* **93**, 117–125 (2007).
12. Bishop, C. M. *Pattern Recognition and Machine Learning* (Springer, 2006).

**Author contributions statement.** Cultivation study and measurement were performed by K.A. Analyzing data and writing manuscript was performed by K.A. and H.I.



## Supplemental Information

# Discovery of the prickle patterning on stem of rose and the mathematical model of the pattern

Kazuaki Amikura<sup>12\*</sup> and Hiroshi Ito<sup>3</sup>

<sup>1</sup>Department of Molecular Biophysics and Biochemistry, Yale University, New Haven, Connecticut, USA;

<sup>2</sup>Department of Computational Biology and Medical Sciences,  
Graduate School of Frontier Sciences, The University of Tokyo, Japan;

<sup>3</sup>Department of Art and Information Design, Faculty of Design, Kyushu University

\*Corresponding Author: [kazuaki.amikura@yale.edu](mailto:kazuaki.amikura@yale.edu)

**Supplementary Figure 1.** Differential values of leaf degrees. a, In order from the top of each stem, the number of leaf index was assigned.  $\Delta\theta$  is the difference of the  $\theta_c$  between the adjacent leaves. The  $\Phi$  is about  $137.5^\circ$  which is the golden angle. b, The histogram represents the  $\Delta\theta$  from all samples.

**a**

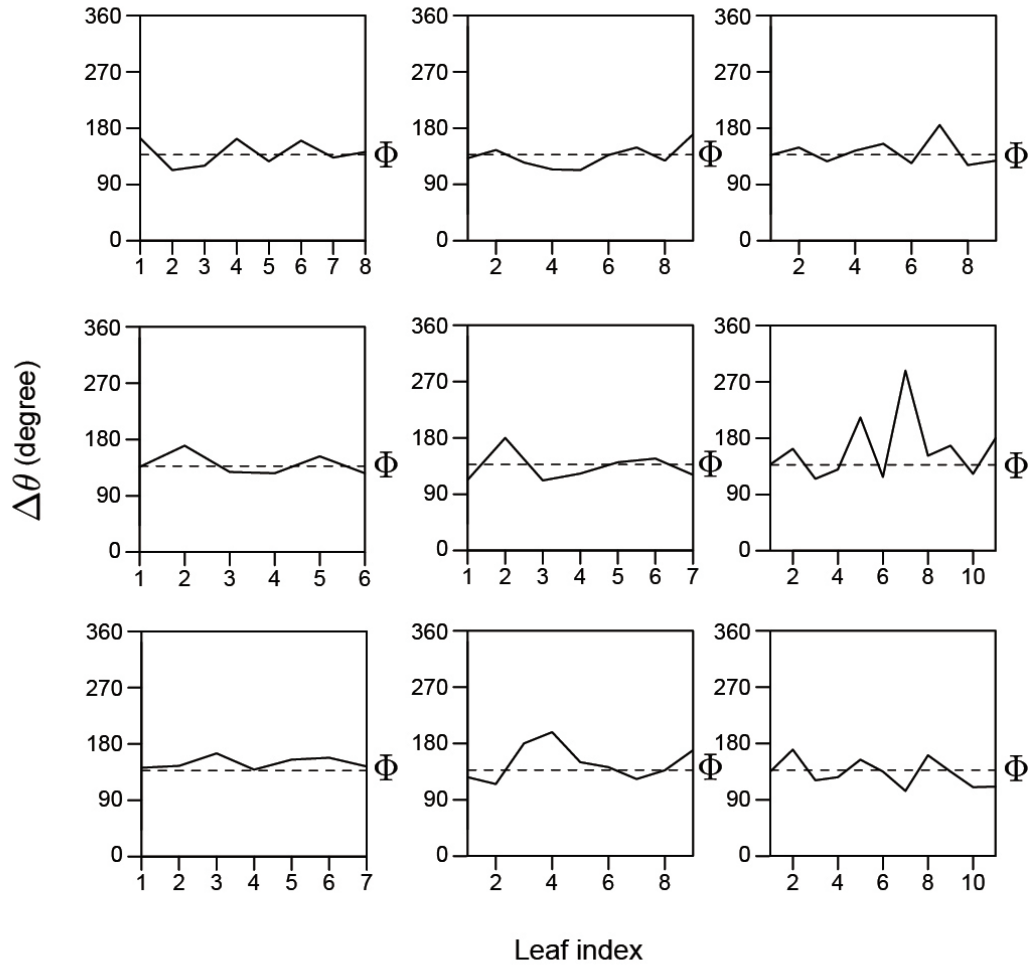

**b**

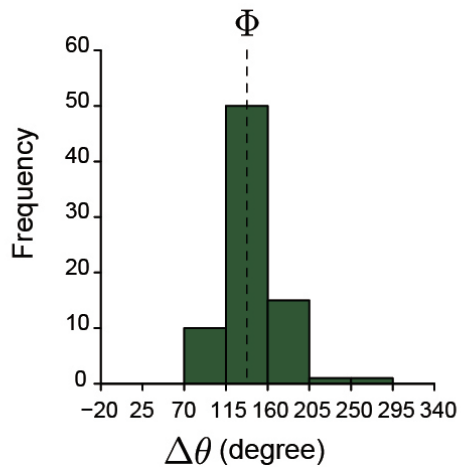

**Supplementary Figure 2.** The modified  $H$ - $\theta_c$  plane of all samples.

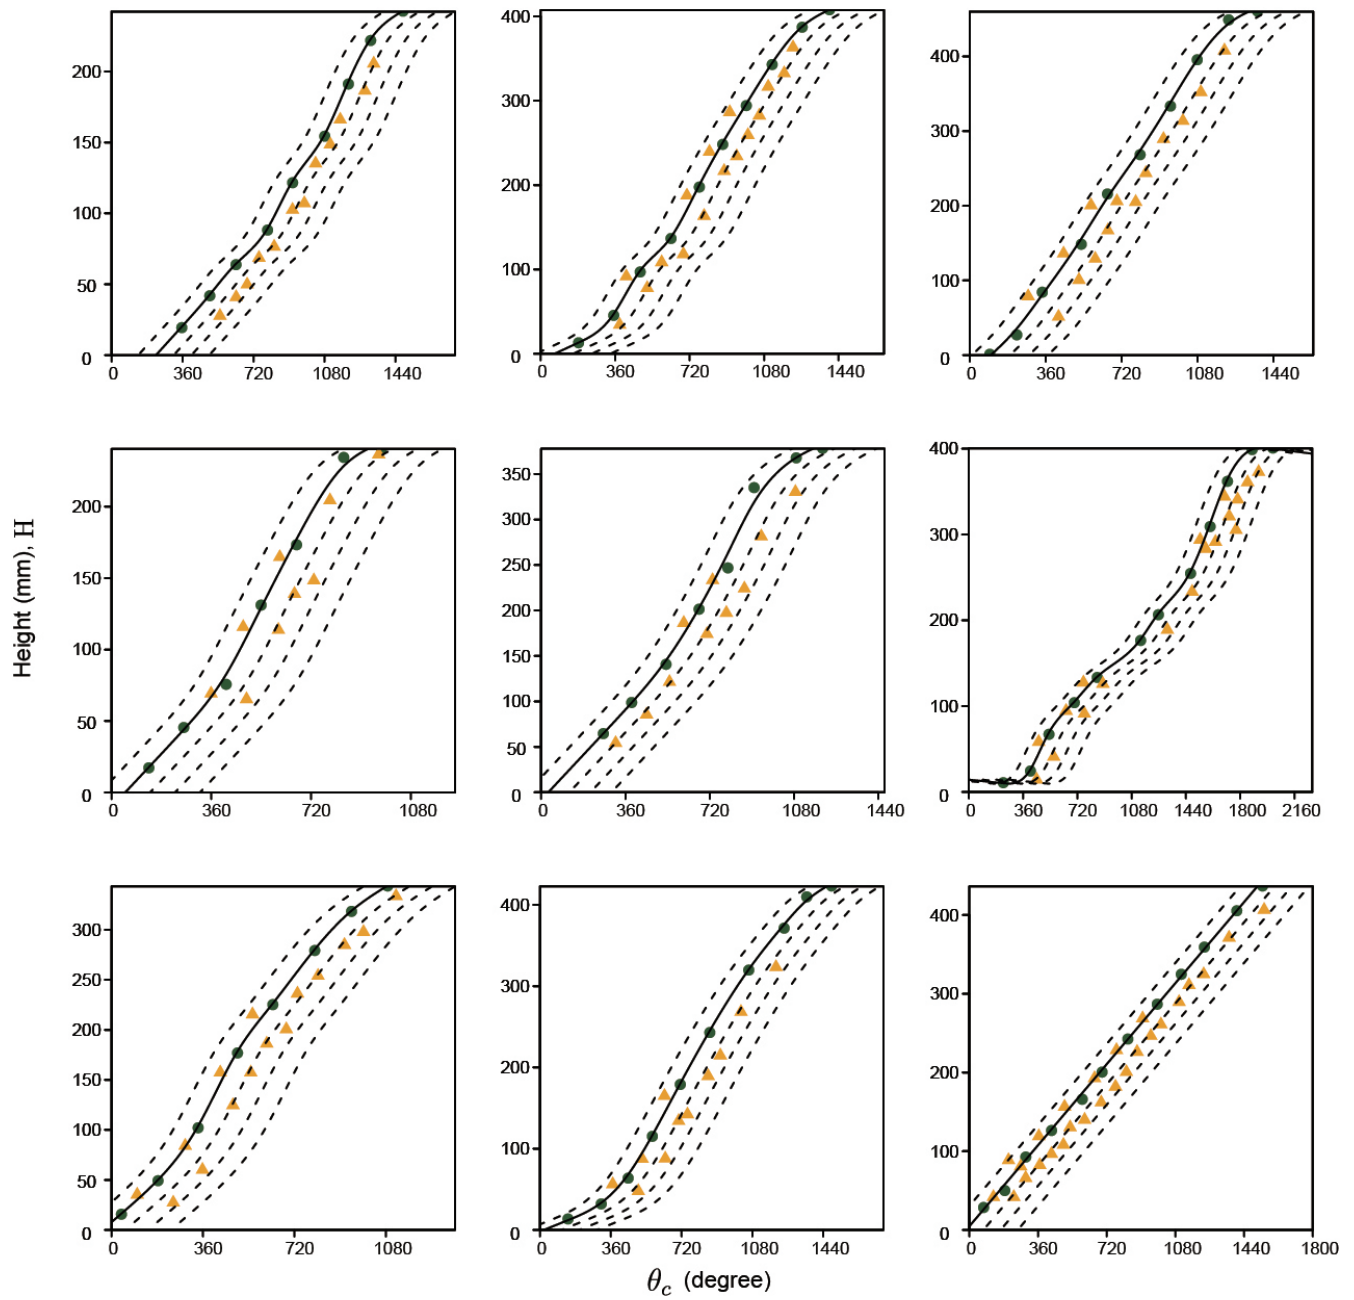



**Supplementary Figure 3.** Analysis variation of  $H$ - $\phi$  plane using optimized parameter. a Estimated distribution of prickles on the  $\phi$ - $h$  plane through kernel density estimation for real data (the same figure as Fig 2b). Two parameter sets were obtained by maximizing the Pearson's correlation between density from real data and  $I^{-1}$  calculated from a model. b, e distribution of  $I^{-1}$  obtained from the optimized model with each optimized parameter sets. c, f The trajectory of the primordia are drawn on the  $\phi$ - $h$  plane. The red and blue represents the interval where the amount of secretion of inhibitor are increasing  $\frac{dk}{dt} > 0$  and decreasing  $\frac{dk}{dt} < 0$ , respectively. d, g The correlation between the estimated density obtained from real data and  $I^{-1}$  obtained from the optimized model. The correlation coefficient  $\rho$  is displayed in each figure.

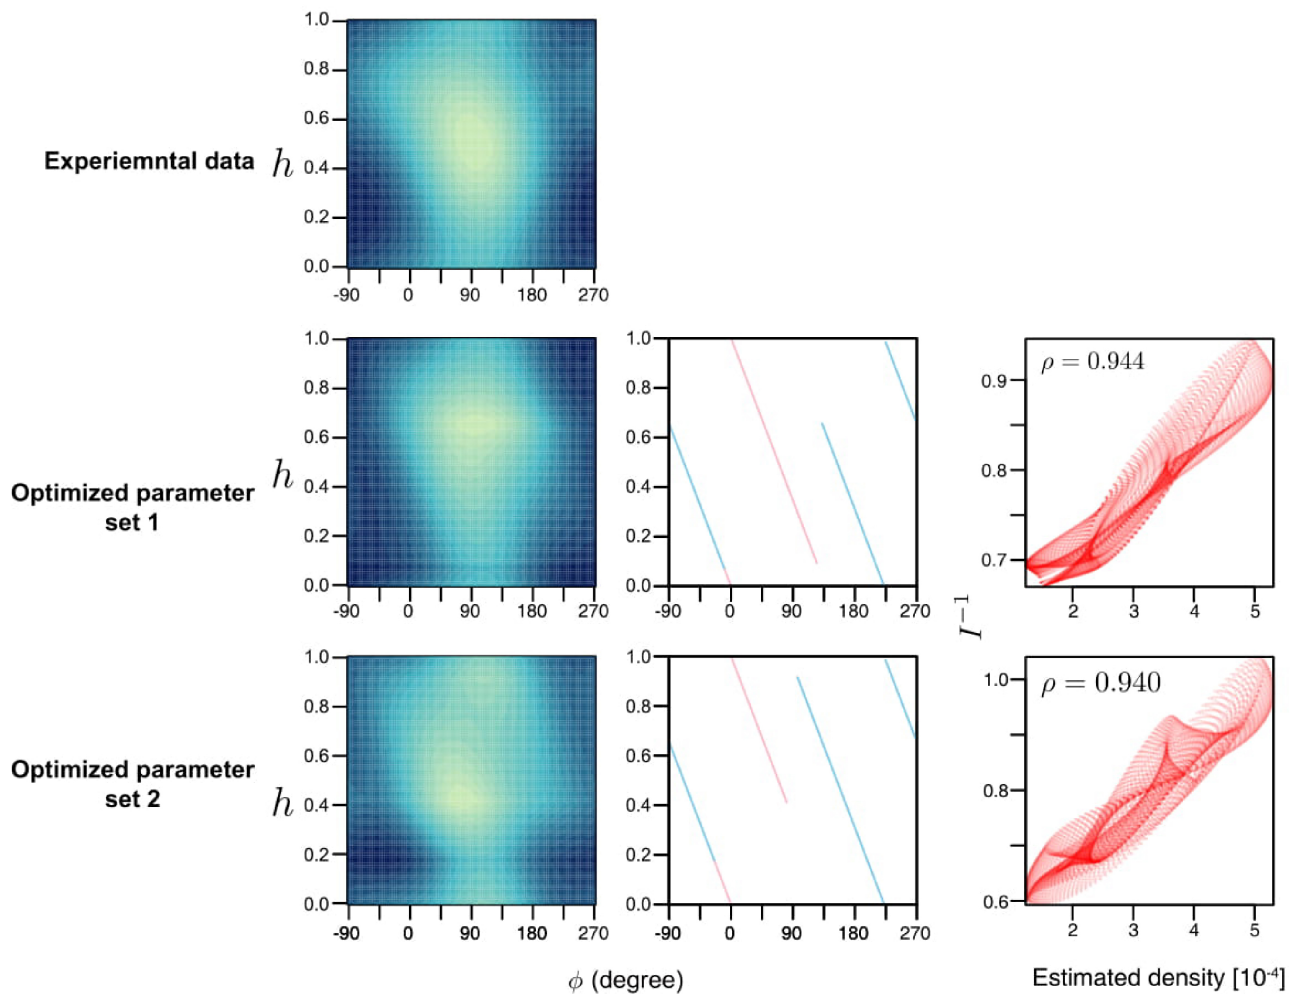

**Supplementary Figure 4.** Parameter sensitivity. a, The correlation between the real data and the simulation data. The  $T_a$ ,  $T_b$  and  $T_c$  is fixed at optimized parameters at Figure 2c.  $\alpha^*$  and  $\beta^*$  is 0.267 and 0.139. b, The  $f(\phi, t)$ - $\phi$  graph is drawn at each point.

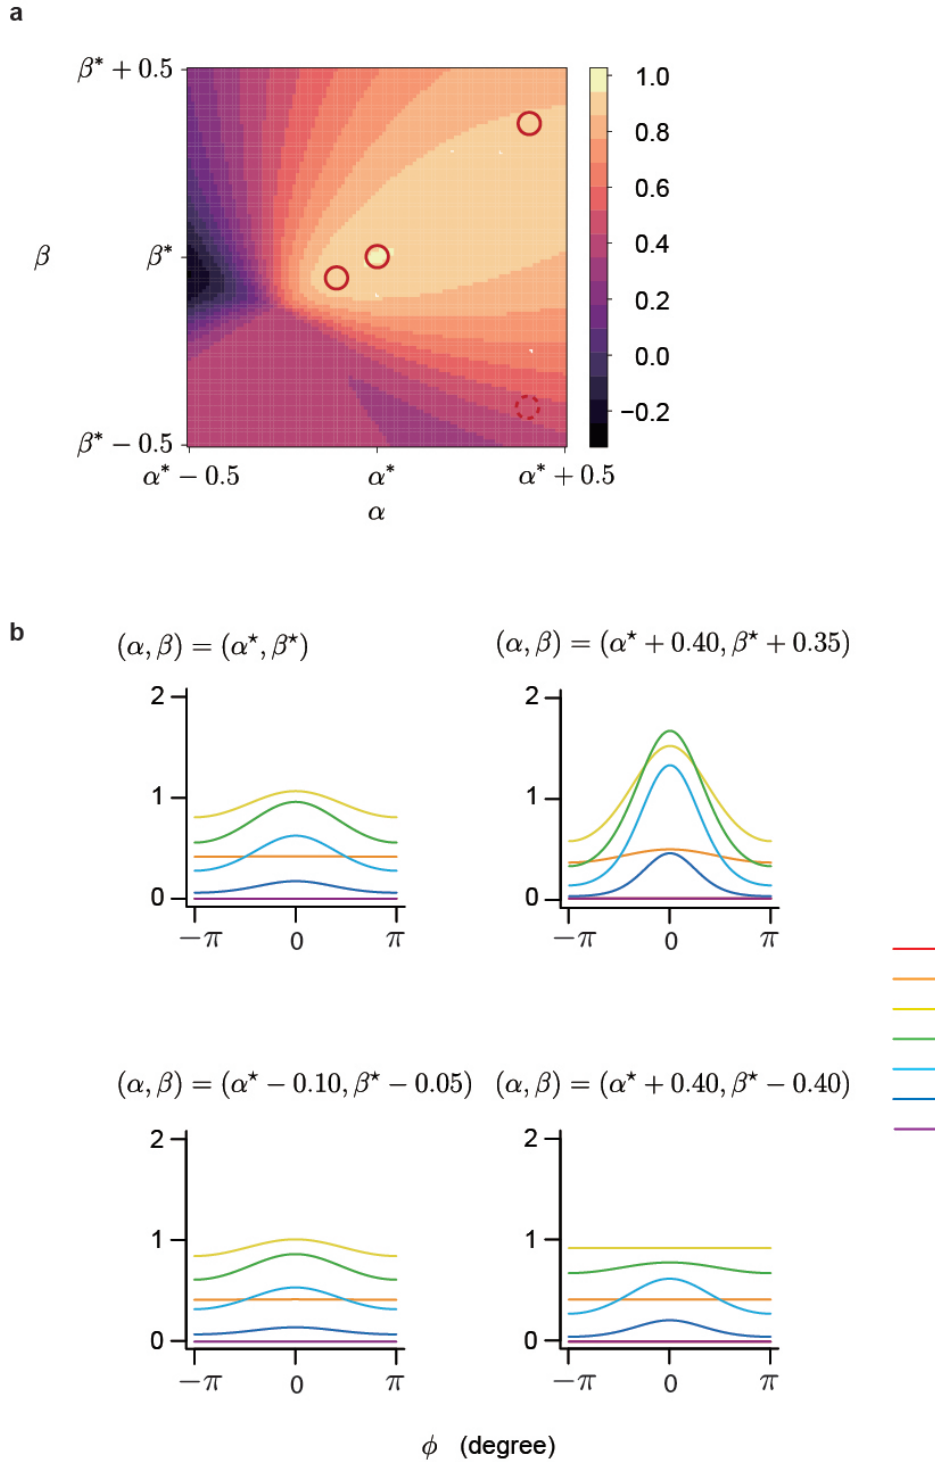

**Supplementary Figure 5.**  $f(\phi, t)$ - $\phi$  graph. a, The graph drawn by the set of parameters of Figure 2c. b, The graph drawn by the set of parameters of Figure 3c.

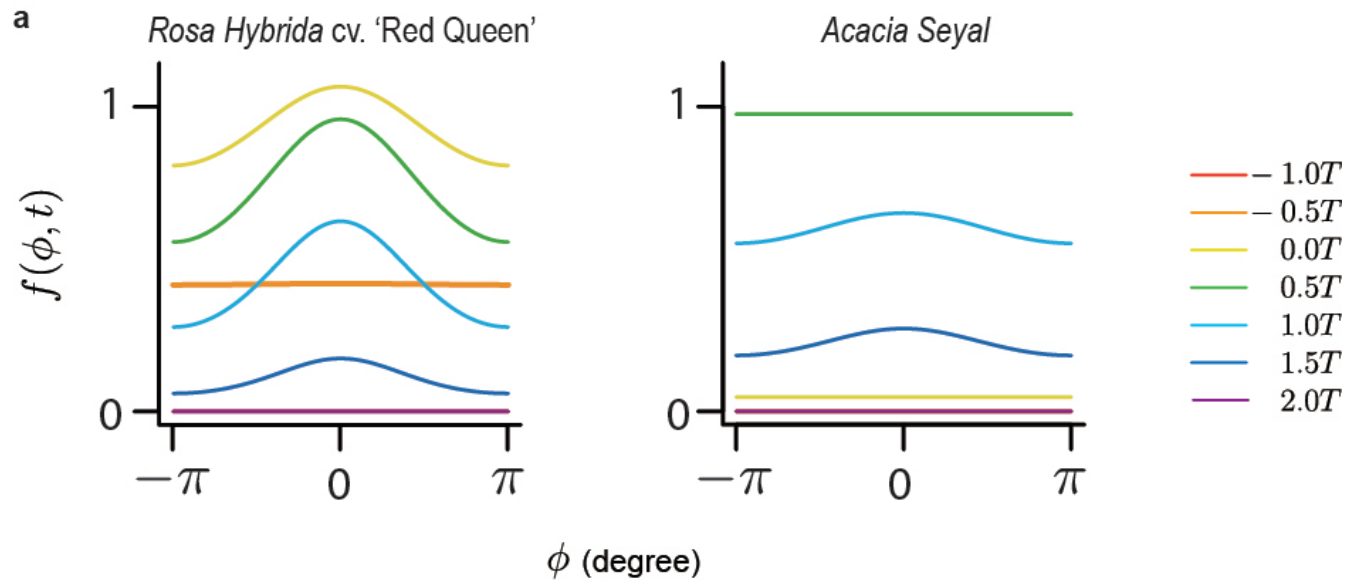



**Supplementary Figure 6.** a, the distribution of  $d_{pp}$ . b, Fused prickle on the stem of *Rosa hybrida* cv. 'Carinella'.

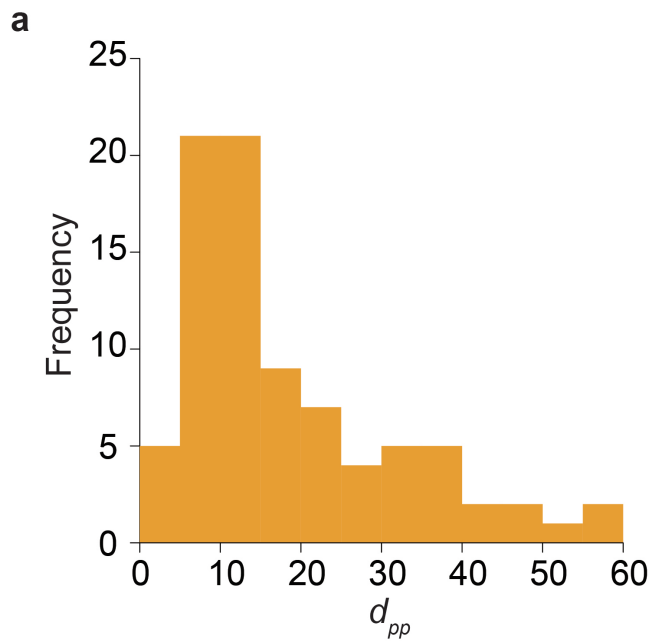

**b**

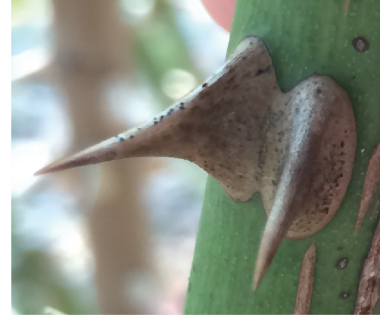

**Supplementary Figure 7.** a, Large and small prickles on the stem of *Rosa hybrida* cv. 'Red Queen'. The black arrow is pointing to the small prickle.

**a**

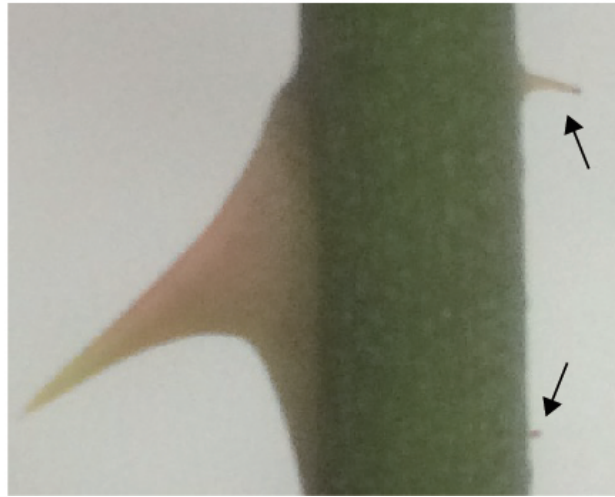

**Supplementary Figure 8.** Bimodality of the distribution of  $\phi$ . a, The divided area in height dependence. b, The histogram of  $h$  in the each area.

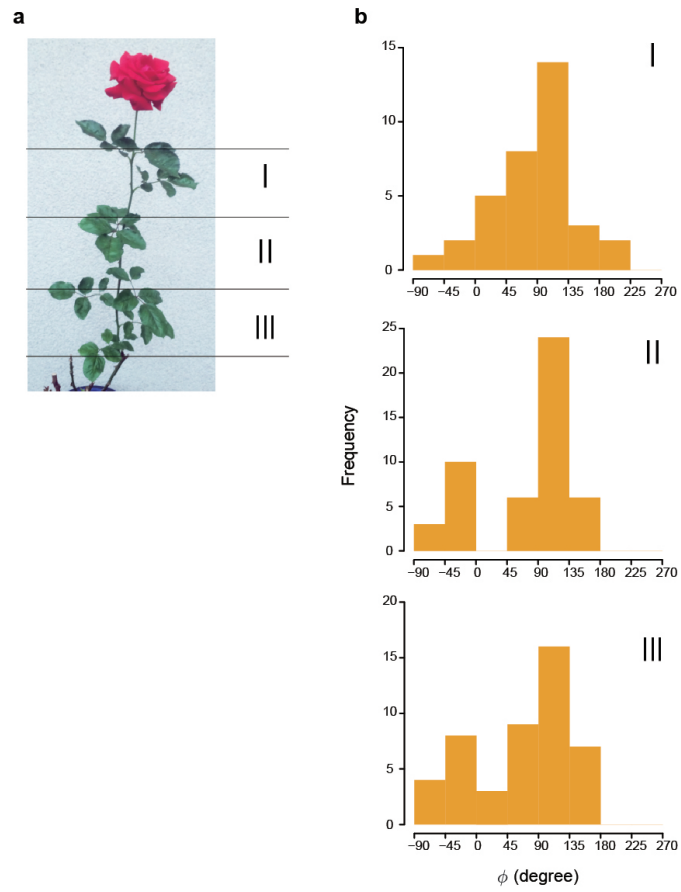

Source: http://biorxiv.org/content/10.1101/811281v1.full.pdf
